# Supplementary material for: Zero- and two-dimensional structures based on AsIII–VIV polyoxometalates
Source: Royal Society of Chemistry journal article supplement (doi:10.1039/b921928e), 2010-01-01
Supplement: b921928e.pdf [file b921928e.pdf]

## ESI

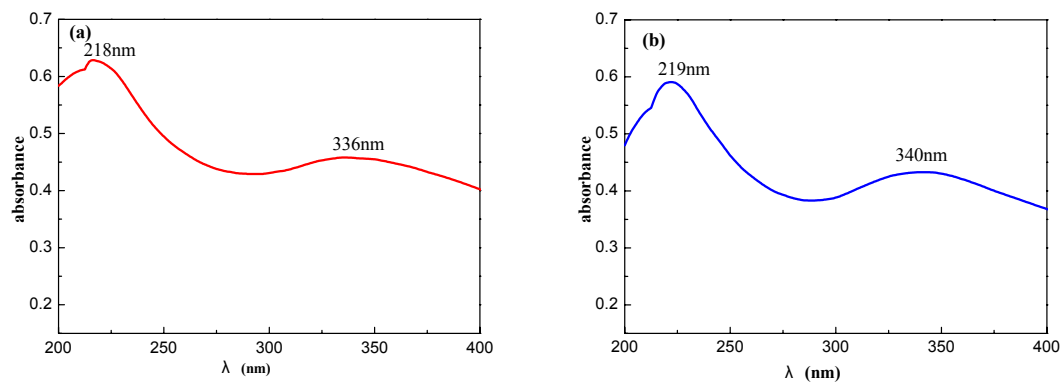

Fig. s1: UV-Vis spectra for compound 1 (a) and compound 2 (b).

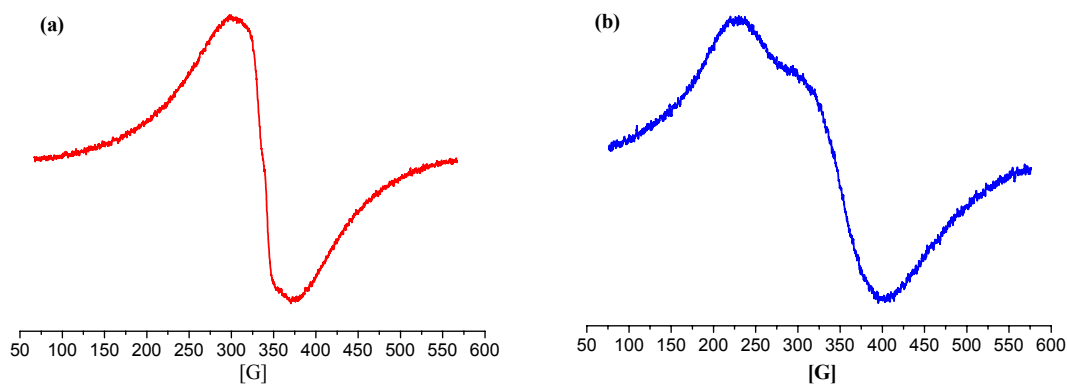

Fig. s2: ESR spectra for compound 1 (a) and 2 (b).

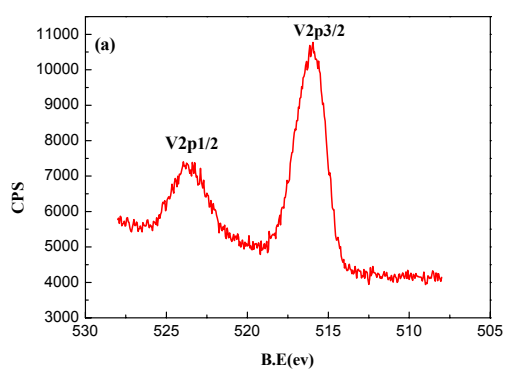

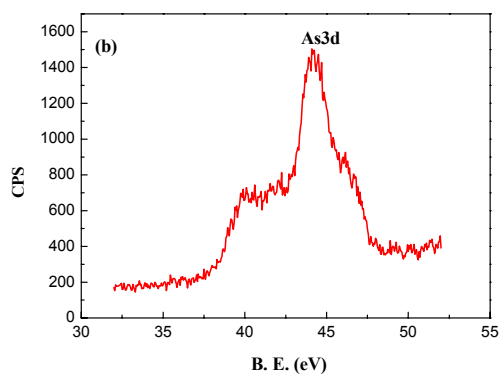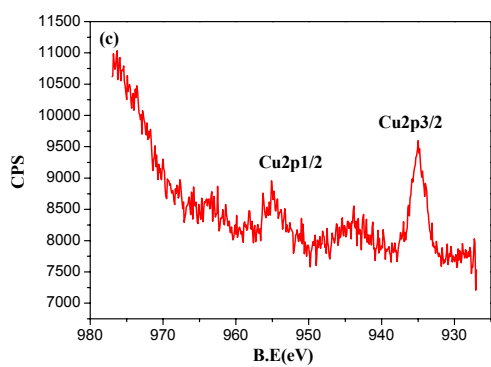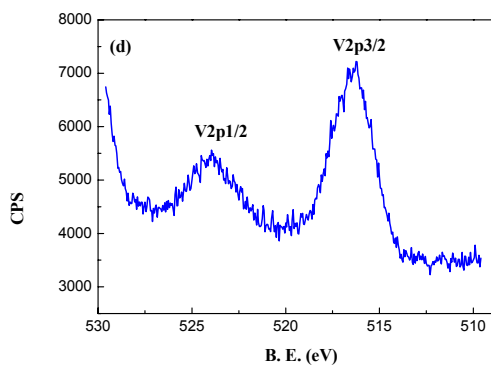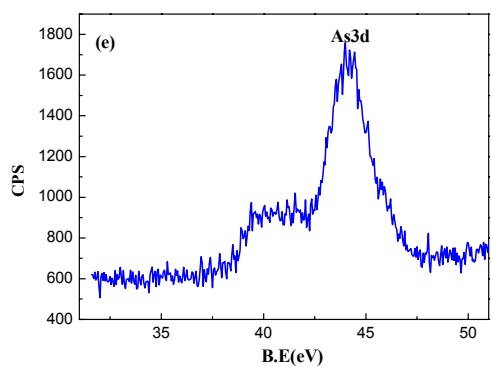

**Fig. s3:** XPS spectra for As(a), V(b) and Cu(c) in compound **1** and XPS spectra for As(d) and V(e) in compound **2**.

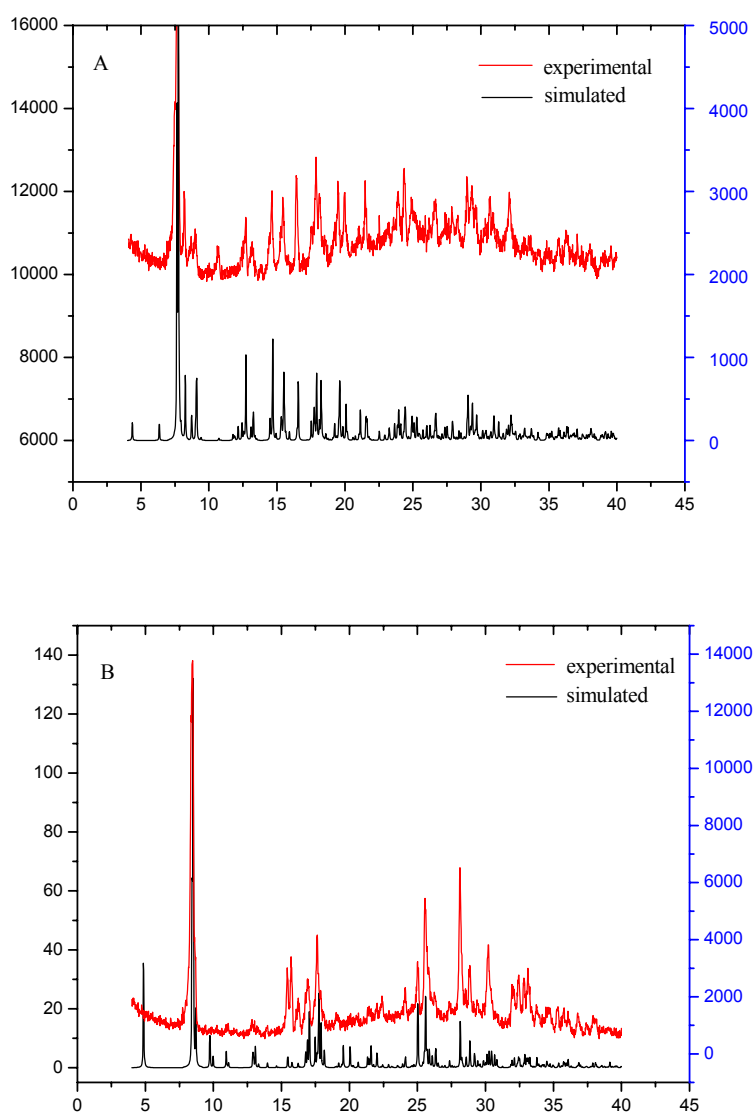

**Fig. s4:** (a) XRD pattern for compound 1. (b) XRD pattern for compound 2.

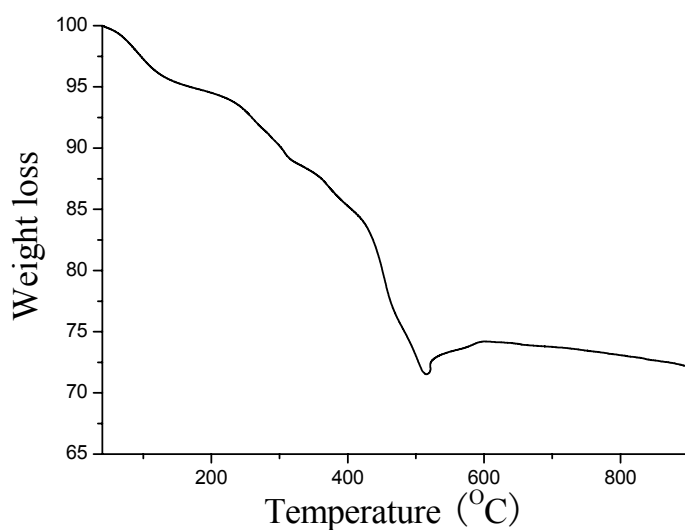

Fig. S5: The TG curve for compound 1.

Table s1: Selected bond lengths of compound 1 and 2.

| Bond lengths in compound 1. |           |            |          |
|-----------------------------|-----------|------------|----------|
| As(1)-O(23)                 | 1.772(6)  | V(5)-O(37) | 1.936(5) |
| As(1)-O(10)                 | 1.776(6)  | V(5)-O(23) | 1.996(6) |
| As(1)-O(28)                 | 1.779(6)  | V(5)-O(34) | 2.028(6) |
| As(2)-O(22)                 | 1.752(6)  | V(6)-O(2)  | 1.602(7) |
| As(2)-O(31)                 | 1.763(6)  | V(6)-O(25) | 1.904(5) |
| As(2)-O(10)                 | 1.782(6)  | V(6)-O(39) | 1.941(5) |
| As(3)-O(34)                 | 1.758(5)  | V(6)-O(12) | 2.003(6) |
| As(3)-O(29)                 | 1.766(5)  | V(6)-O(30) | 2.015(6) |
| As(3)-O(38)                 | 1.775(6)  | V(7)-O(9)  | 1.612(6) |
| As(4)-O(24)                 | 1.755(6)  | V(7)-O(16) | 1.902(5) |
| As(4)-O(30)                 | 1.768(5)  | V(7)-O(33) | 1.905(5) |
| As(4)-O(38)                 | 1.807(6)  | V(7)-O(31) | 1.995(6) |
| As(5)-O(27)                 | 1.752(5)  | V(7)-O(35) | 2.001(6) |
| As(5)-O(13)                 | 1.778(6)  | V(8)-O(5)  | 1.620(5) |
| As(5)-O(35)                 | 1.778(5)  | V(8)-O(42) | 1.913(5) |
| As(6)-O(12)                 | 1.761(5)  | V(8)-O(16) | 1.930(6) |
| As(6)-O(14)                 | 1.777(6)  | V(8)-O(14) | 1.963(6) |
| As(6)-O(13)                 | 1.795(6)  | V(8)-O(35) | 1.987(5) |
| Cu(1)-N(1)                  | 1.998(8)  | V(9)-O(15) | 1.634(5) |
| Cu(1)-N(1)#1                | 1.998(8)  | V(9)-O(36) | 1.905(5) |
| Cu(1)-N(2)                  | 2.029(7)  | V(9)-O(41) | 1.920(6) |
| Cu(1)-N(2)#1                | 2.029(7)  | V(9)-O(24) | 1.975(6) |
| Cu(2)-N(3)                  | 1.968(16) | V(9)-O(34) | 1.990(5) |
| Cu(2)-N(5)                  | 1.981(12) | V(10)-O(8) | 1.602(6) |

|                             |           |             |           |
|-----------------------------|-----------|-------------|-----------|
| Cu(2)-N(4)                  | 2.019(10) | V(10)-O(40) | 1.927(5)  |
| Cu(2)-N(6)                  | 2.071(11) | V(10)-O(42) | 1.927(6)  |
| Cu(2)-O(4)                  | 2.398(5)  | V(10)-O(39) | 1.964(6)  |
| Cu(3)-N(8)                  | 1.991(8)  | V(10)-O(14) | 2.018(6)  |
| Cu(3)-N(10)                 | 1.992(8)  | V(11)-O(7)  | 1.608(6)  |
| Cu(3)-N(7)                  | 2.018(9)  | V(11)-O(32) | 1.941(5)  |
| Cu(3)-N(9)                  | 2.020(8)  | V(11)-O(42) | 1.948(6)  |
| V(1)-O(1)                   | 1.616(7)  | V(11)-O(16) | 1.964(5)  |
| V(1)-O(21)                  | 1.916(6)  | V(11)-O(22) | 2.030(6)  |
| V(1)-O(33)                  | 1.920(6)  | V(12)-O(4)  | 1.609(6)  |
| V(1)-O(28)                  | 1.984(6)  | V(12)-O(21) | 1.917(6)  |
| V(1)-O(31)                  | 1.989(6)  | V(12)-O(26) | 1.927(6)  |
| V(2)-O(19)                  | 1.596(6)  | V(12)-O(33) | 1.965(6)  |
| V(2)-O(26)                  | 1.929(5)  | V(12)-O(27) | 2.031(5)  |
| V(2)-O(25)                  | 1.930(6)  | V(13)-O(20) | 1.612(5)  |
| V(2)-O(27)                  | 1.996(6)  | V(13)-O(36) | 1.930(6)  |
| V(2)-O(12)                  | 2.000(6)  | V(13)-O(21) | 1.933(5)  |
| V(3)-O(18)                  | 1.603(6)  | V(13)-O(41) | 1.952(5)  |
| V(3)-O(40)                  | 1.914(6)  | V(13)-O(28) | 2.013(6)  |
| V(3)-O(39)                  | 1.918(5)  | V(14)-O(6)  | 1.601(6)  |
| V(3)-O(29)                  | 1.979(6)  | V(14)-O(26) | 1.926(5)  |
| V(3)-O(30)                  | 2.013(5)  | V(14)-O(36) | 1.944(6)  |
| V(4)-O(3)                   | 1.601(6)  | V(14)-O(25) | 1.953(5)  |
| V(4)-O(32)                  | 1.908(5)  | V(14)-O(24) | 2.035(5)  |
| V(4)-O(37)                  | 1.947(6)  | V(15)-O(17) | 1.598(6)  |
| V(4)-O(22)                  | 1.987(6)  | V(15)-O(32) | 1.906(6)  |
| V(4)-O(23)                  | 1.991(6)  | V(15)-O(40) | 1.936(5)  |
| V(5)-O(11)                  | 1.592(6)  | V(15)-O(37) | 1.958(5)  |
| V(5)-O(41)                  | 1.918(5)  | V(15)-O(29) | 2.009(6)  |
| Bond lengths in compound 2. |           |             |           |
| As(1)-O(6)                  | 1.762(8)  | V(5)-O(31)  | 1.980(9)  |
| As(1)-O(33)                 | 1.789(9)  | V(5)-O(11)  | 1.985(9)  |
| As(1)-O(4)                  | 1.789(8)  | V(6)-O(35)  | 1.607(9)  |
| As(2)-O(11)                 | 1.761(8)  | V(6)-O(36)  | 1.937(8)  |
| As(3)-O(34)                 | 1.768(9)  | V(8)-O(25)  | 1.929(8)  |
| As(3)-O(10)                 | 1.802(8)  | V(8)-O(4)   | 1.949(8)  |
| As(6)-O(16)                 | 1.737(9)  | V(8)-O(36)  | 1.906(9)  |
| As(6)-O(15)                 | 1.786(9)  | V(8)-O(32)  | 1.999(9)  |
| As(6)-O(9)                  | 1.789(9)  | V(9)-O(39)  | 1.992(10) |
| As(7)-O(14)                 | 1.748(9)  | V(9)-O(22)  | 1.926(9)  |
| As(7)-O(39)                 | 1.768(9)  | V(9)-O(49)  | 1.980(10) |
| As(7)-O(15)                 | 1.780(9)  | V(9)-O(33)  | 1.983(9)  |
| As(8)-O(8)                  | 1.779(9)  | V(9)-O(21)  | 1.986(9)  |

|             |           |             |           |
|-------------|-----------|-------------|-----------|
| As(8)-O(30) | 1.783(11) | V(10)-O(18) | 1.596(8)  |
| As(8)-O(41) | 1.785(10) | V(10)-O(17) | 1.924(9)  |
| V(1)-O(34)  | 1.590(10) | V(10)-O(25) | 1.935(9)  |
| V(1)-O(9)   | 1.955(9)  | V(10)-O(24) | 1.997(9)  |
| V(1)-O(8)   | 1.970(9)  | V(10)-O(26) | 2.017(9)  |
| V(1)-O(10)  | 1.989(8)  | V(11)-O(21) | 1.604(9)  |
| V(1)-O(6)   | 1.991(9)  | V(11)-O(17) | 1.930(9)  |
| V(2)-O(7)   | 1.594(9)  | V(11)-O(22) | 1.941(9)  |
| V(2)-O(25)  | 1.896(9)  | V(11)-O(23) | 1.969(9)  |
| V(2)-O(1)   | 1.904(9)  | V(11)-O(24) | 1.977(9)  |
| V(2)-O(6)   | 1.985(8)  | V(12)-O(27) | 1.610(10) |
| V(2)-O(8)   | 2.005(9)  | V(12)-O(17) | 1.920(10) |
| V(3)-O(40)  | 1.604(9)  | V(12)-O(22) | 1.941(10) |
| V(3)-O(19)  | 1.938(10) | V(12)-O(42) | 1.978(10) |
| V(3)-O(5)   | 1.956(10) | V(12)-O(16) | 2.010(10) |
| V(3)-O(10)  | 1.977(9)  | V(13)-O(28) | 1.570(10) |
| V(3)-O(9)   | 1.986(9)  | V(13)-O(16) | 1.965(9)  |
| V(4)-O(38)  | 1.625(10) | V(13)-O(29) | 1.975(10) |
| V(4)-O(12)  | 1.917(9)  | V(13)-O(42) | 1.983(10) |
| V(4)-O(36)  | 1.948(8)  | V(13)-O(14) | 1.997(10) |
| V(4)-O(4)   | 1.972(8)  | V(14)-O(13) | 1.629(10) |
| V(4)-O(11)  | 1.990(9)  | V(14)-O(36) | 1.926(9)  |
| V(5)-O(37)  | 1.591(9)  | V(14)-O(12) | 1.931(9)  |
| V(5)-O(5)   | 1.930(9)  | V(14)-O(29) | 1.983(10) |
| V(5)-O(12)  | 1.941(9)  | V(14)-O(14) | 2.004(9)  |
